# Supplementary material
Source: PubMed Central journal article supplement (PMC6014703)
Supplement: EHP2239.s001.acco.pdf [file EHP2239.s001.acco.pdf]

**Note to readers with disabilities:** *EHP* strives to ensure that all journal content is accessible to all readers. However, some figures and Supplemental Material published in *EHP* articles may not conform to [508 standards](#) due to the complexity of the information being presented. If you need assistance accessing journal content, please contact [ehp508@niehs.nih.gov](mailto:ehp508@niehs.nih.gov). Our staff will work with you to assess and meet your accessibility needs within 3 working days.

### **Supplemental Material**

#### **Air Pollution and Performance-Based Physical Functioning in Dutch Older Adults**

Femke de Zwart, Bert Brunekreef, Erik Timmermans, Dorly Deeg, and Ulrike Gehring

#### **Table of Contents**

**Table S1.** Land-use regression models with model performance (leave-one-out cross-validation  $R^2$ ,  $R^2_{LOOCV}$ ).

**Table S2.** Distribution of baseline performance scores by participant characteristics (N=1,762 participants).

**Table S3.** Residential exposure to air pollution – Pearson correlations between pollutants.

**Table S4.** Distribution of daily average air pollution concentrations on the days of the physical performance test for all study participants.

**Table S5.** Adjusted associations between performance-based physical functioning and residential air pollution exposure from linear mixed model analyses with additional adjustment for air pollution concentrations during the week preceding the performance test.

**Table S6.** Adjusted associations between physical performance (performance-based and self-reported) and residential air pollution exposure from linear mixed model analyses, restricted to participants who completed all three cycles of data collection.

**Table S7.** Adjusted associations between physical performance (performance-based and self-reported) and residential air pollution exposure from linear mixed model analyses, restricted to participants who did not change address between three years prior to the 2005/2006 cycle and the last completed cycle.

**Table S8.** Post hoc sensitivity analyses of residual confounding of the association between air pollution and performance-based physical functioning due to an unmeasured binary confounder (U).

**Table S9.** Adjusted associations between physical performance (performance-based and self-reported) and residential air pollution exposure from linear mixed model analyses without exposure-time since baseline interaction terms.

**Figure S1.** Flow-chart of the study sample.

**Figure S2.** Adjusted associations between self-reported physical functioning and quartiles of residential air pollution exposure from linear mixed model analyses with p-values of F-tests for equality of means and trend tests using quartile midpoints (N=1,758 participants, n=4,405 observations).

**Figure S3.** Adjusted sex-specific associations between performance-based physical functioning and residential air pollution exposure from linear mixed model analyses with exposure-sex interaction terms (N=1,735 participants, n=4,039 observations). Grey dots represent females, white dots represent males.

**Supplemental material, Table S1.** Land-use regression models with model performance (leave-one-out cross-validation  $R^2$ ,  $R^2_{\text{Loocv}}$ )

| Exposure              | Land-use regression model                                                                                                                                                                                                                                                                                                                              | $R^2_{\text{Loocv}}$ |
|-----------------------|--------------------------------------------------------------------------------------------------------------------------------------------------------------------------------------------------------------------------------------------------------------------------------------------------------------------------------------------------------|----------------------|
| NO <sub>2</sub>       | $-7.80 + 1.18 \times \text{REGIONALESTIMATE} + 2.30 \times 10^{-5} \times \text{POP\_5000} + 2.46 \times 10^{-6} \times \text{TRAFLOAD\_50} + 1.06 \times 10^{-4} \times \text{ROADLENGTH\_1000} + 9.84 \times 10^{-5} \times \text{HEAVYTRAFLOAD\_25} + 12.19 \times \text{DISTINVNEARC1} + 4.47 \times 10^{-7} \times \text{HEAVYTRAFLOAD\_25\_500}$ | 0.81                 |
| NO <sub>x</sub>       | $3.25 + 0.74 \times \text{REGIONALESTIMATE} + 4.22 \times 10^{-6} \times \text{TRAFLOAD\_50} + 6.36 \times 10^{-4} \times \text{POP\_1000} + 2.39 \times 10^{-6} \times \text{HEAVYTRAFLOAD\_500} + 71.65 \times \text{DISTINVMAJOR1} + 0.21 \times \text{MAJORROADLENGTH\_25}$                                                                        | 0.82                 |
| PM <sub>2.5</sub> abs | $0.07 + 2.95 \times 10^{-9} \times \text{TRAFLOAD\_500} + 2.93 \times 10^{-3} \times \text{MAJORROADLENGTH\_50} + 0.85 \times \text{REGIONALESTIMATE} + 7.90 \times 10^{-9} \times \text{HLDRES\_5000} + 1.72 \times 10^{-6} \times \text{HEAVYTRAFLOAD\_50}$                                                                                          | 0.89                 |
| PM <sub>10</sub>      | $23.71 + 2.16 \times 10^{-8} \times \text{TRAFMAJORLOAD\_500} + 6.68 \times 10^{-6} \times \text{POP\_5000} + 0.02 \times \text{MAJORROADLENGTH\_50}$                                                                                                                                                                                                  | 0.60                 |
| PM <sub>2.5</sub>     | $9.46 + 0.42 \times \text{REGIONALESTIMATE} + 0.01 \times \text{MAJORROADLENGTH\_50} + 2.28 \times 10^{-9} \times \text{TRAFMAJORLOAD\_1000}$                                                                                                                                                                                                          | 0.61                 |
| PM <sub>coarse</sub>  | $7.59 + 5.02 \times 10^{-9} \times \text{TRAFLOAD\_1000} + 1.38 \times 10^{-7} \times \text{PORT\_5000} + 5.38 \times 10^{-5} \times \text{TRAFNEAR}$                                                                                                                                                                                                  | 0.38                 |

DISTINVMAJOR1: inverse distance ( $\text{m}^{-1}$ ) to the nearest road of the local road network; DISTINVNEARC1: Inverse distance to the nearest road; HEAVYTRAFLOAD\_X: Total heavy-duty traffic load of all roads in X m buffer (sum of (heavy-duty traffic intensity \* length of all segments)); HLDRES\_X: Sum of high density and low density residential land in X m buffer; MAJORROADLENGTH\_X: Road length of major roads in X m buffer; POP\_X: Number of inhabitants in X m buffer; PORT: port in X m buffer; REGIONALESTIMATE: Regional estimate; ROADLENGTH\_X: Road length of major roads in X m buffer; TRAFLOAD\_X: Total traffic load of all roads in X m buffer (sum of (traffic intensity \* length of all segments)); TRAFMAJORLOAD\_X: Total traffic load of major roads in X m buffer (sum of (traffic intensity \* length of all segments)); TRAFNEAR: Traffic intensity on nearest road;

**Supplementary material, Table S2.** Distribution of baseline performance scores by participant characteristics (N=1,762 participants).

| Covariate                      | Performance-based |            |                      | Self-reported |            |                      |
|--------------------------------|-------------------|------------|----------------------|---------------|------------|----------------------|
|                                | N                 | Mean (std) | p-value <sup>a</sup> | N             | Mean (std) | p-value <sup>a</sup> |
| Age at performance measurement |                   |            | <b>&lt;0.0001</b>    |               |            | <b>&lt;0.0001</b>    |
| ≤ 65 years                     | 606               | 12.8 (2.5) |                      | 630           | 33.9 (2.8) |                      |
| 65 – 70 years                  | 676               | 12.4 (2.8) |                      | 714           | 33.4 (3.6) |                      |
| 70 – 75 years                  | 905               | 11.9 (2.9) |                      | 946           | 33.1 (3.6) |                      |
| 75 – 80 years                  | 750               | 10.8 (3.3) |                      | 801           | 32.3 (4.2) |                      |
| 80 – 85 years                  | 559               | 9.3 (3.7)  |                      | 598           | 30.5 (5.4) |                      |
| > 85 years                     | 609               | 7.0 (3.6)  |                      | 716           | 27.0 (7.0) |                      |
| Female sex                     |                   |            | <b>&lt;0.0001</b>    |               |            | <b>&lt;0.0001</b>    |
| Male                           | 1896              | 11.1 (3.3) |                      | 1985          | 32.8 (4.1) |                      |
| Female                         | 2209              | 10.5 (3.9) |                      | 2420          | 30.9 (5.8) |                      |
| Educational level              |                   |            | <b>&lt;0.0001</b>    |               |            |                      |
| Low                            | 1892              | 10.1 (3.8) |                      | 2073          | 30.8 (5.8) |                      |
| Medium                         | 1409              | 11.1 (3.6) |                      | 1494          | 32.2 (4.6) |                      |
| High                           | 804               | 11.9 (3.2) |                      | 838           | 33.3 (3.7) |                      |
| Smoking                        |                   |            | <b>0.0009</b>        |               |            | <b>&lt;0.0001</b>    |
| Never smoker                   | 1264              | 10.4 (4.0) |                      | 1382          | 31.0 (5.8) |                      |
| Ex-smoker                      | 2169              | 10.9 (3.6) |                      | 2298          | 32.1 (4.6) |                      |
| Current smoker                 | 672               | 11.2 (3.3) |                      | 725           | 32.1 (5.2) |                      |
| Alcohol consumption            |                   |            | <b>&lt;0.0001</b>    |               |            | <b>&lt;0.0001</b>    |
| Non drinker                    | 572               | 9.0 (4.1)  |                      | 651           | 28.8 (6.8) |                      |
| Light drinker                  | 2143              | 10.8 (3.7) |                      | 2287          | 31.8 (5.0) |                      |
| Moderate drinker               | 1147              | 11.7 (3.2) |                      | 1209          | 33.0 (3.9) |                      |
| Excessive drinker              | 243               | 11.7 (3.3) |                      | 258           | 32.9 (3.9) |                      |

**Supplementary material, Table S2.** (continued)

| Covariate                      | Performance-based |            |                      | Self-reported |            |                      |
|--------------------------------|-------------------|------------|----------------------|---------------|------------|----------------------|
|                                | N                 | Mean (std) | p-value <sup>a</sup> | N             | Mean (std) | p-value <sup>a</sup> |
| Physical activity past 2 weeks |                   |            | <b>&lt;0.0001</b>    |               |            | <b>&lt;0.0001</b>    |
| < 78 min/day                   | 905               | 9.9 (4.0)  |                      | 1024          | 30.0 (6.7) |                      |
| 78 – 199 min/day               | 2126              | 11.0 (3.6) |                      | 2257          | 32.1 (4.6) |                      |
| ≥ 199 min/day                  | 1074              | 11.1 (3.5) |                      | 1124          | 32.6 (4.1) |                      |
| Depression                     |                   |            | <b>&lt;0.0001</b>    |               |            | <b>&lt;0.0001</b>    |
| No                             | 3572              | 11.1 (3.5) |                      | 3793          | 32.3 (4.6) |                      |
| Yes                            | 533               | 9.1 (4.1)  |                      | 612           | 28.5 (6.8) |                      |
| Chronic diseases               |                   |            | <b>&lt;0.0001</b>    |               |            | <b>&lt;0.0001</b>    |
| 0                              | 979               | 12.4 (2.8) |                      | 1033          | 34.0 (2.9) |                      |
| 1                              | 1509              | 11.3 (3.3) |                      | 1613          | 32.6 (4.1) |                      |
| 2 or more                      | 1617              | 9.4 (3.9)  |                      | 1759          | 29.6 (6.2) |                      |

<sup>a</sup> F-test taking into account the correlation between repeated observations within the same participant.

**Supplementary material, Table S3.** Residential exposure to air pollution – Pearson correlations between pollutants.

|                             | <b>NO<sub>2</sub></b> | <b>NO<sub>x</sub></b> | <b>PM<sub>2.5</sub> abs</b> | <b>PM<sub>2.5</sub></b> | <b>PM<sub>10</sub></b> | <b>PM<sub>coarse</sub></b> |
|-----------------------------|-----------------------|-----------------------|-----------------------------|-------------------------|------------------------|----------------------------|
| <b>NO<sub>2</sub></b>       | 1.00                  | 0.91                  | 0.88                        | 0.43                    | 0.87                   | 0.89                       |
| <b>NO<sub>x</sub></b>       |                       | 1.00                  | 0.86                        | 0.43                    | 0.88                   | 0.87                       |
| <b>PM<sub>2.5</sub> abs</b> |                       |                       | 1.00                        | 0.69                    | 0.92                   | 0.82                       |
| <b>PM<sub>2.5</sub></b>     |                       |                       |                             | 1.00                    | 0.48                   | 0.36                       |
| <b>PM<sub>10</sub></b>      |                       |                       |                             |                         | 1.00                   | 0.90                       |
| <b>PM<sub>coarse</sub></b>  |                       |                       |                             |                         |                        | 1.00                       |

**Supplementary material, Table S4.** Distribution of daily average air pollution concentrations on the days of the physical performance test for all study participants.

| <b>Pollutant</b>                      | <b>Mean (SD)</b> | <b>Min</b> | <b>Median</b> | <b>Max</b> | <b>IQR</b> |
|---------------------------------------|------------------|------------|---------------|------------|------------|
| NO <sub>2</sub> (µg/m <sup>3</sup> )  | 18.6 (7.1)       | 7.4        | 17.1          | 47.8       | 11.1       |
| PM <sub>10</sub> (µg/m <sup>3</sup> ) | 23.9 (10.1)      | 6.7        | 21.9          | 69.0       | 15.0       |

**Supplemental material, Table S5.** Adjusted <sup>a</sup> associations <sup>b</sup> between performance-based physical functioning and residential air pollution exposure from linear mixed model analyses with additional adjustment for air pollution concentrations during the week preceding the performance test <sup>c</sup>.

| Pollutant            | Increment                             | Mean       |                | p-value |
|----------------------|---------------------------------------|------------|----------------|---------|
|                      |                                       | difference | (95% CI)       |         |
| NO <sub>2</sub>      | 8.9 µg/m <sup>3</sup>                 | -0.22      | (-0.42; -0.02) | 0.028   |
| NO <sub>x</sub>      | 13.5 µg/m <sup>3</sup>                | -0.20      | (-0.36; -0.03) | 0.019   |
| PM <sub>2.5abs</sub> | 0.31 10 <sup>-5</sup> m <sup>-1</sup> | -0.12      | (-0.29; 0.06)  | 0.182   |
| PM <sub>2.5</sub>    | 1.4 µg/m <sup>3</sup>                 | 0.18       | (-0.05; 0.41)  | 0.130   |
| PM <sub>10</sub>     | 1.5 µg/m <sup>3</sup>                 | -0.21      | (-0.36; -0.07) | 0.004   |
| PM <sub>coarse</sub> | 0.8 µg/m <sup>3</sup>                 | -0.18      | (-0.31; -0.05) | 0.008   |

<sup>a</sup> Adjusted for age, sex, education level, smoking, alcohol consumption, depression, physical activity, area-level socio economic status defined as the status score of the four-position postcode, air pollution concentrations on the day of the performance test, and cross-products of time since baseline with education, alcohol consumption, and depression.

<sup>b</sup> Associations are presented as mean difference in physical performance score with 95% confidence intervals (CI) for an interquartile range increase in air pollution exposure and were derived from models with exposure and exposure-time since baseline interaction.

<sup>c</sup> Associations with NO<sub>2</sub> and NO<sub>x</sub> were adjusted for NO<sub>2</sub> concentrations on the day of the test, all other associations were adjusted for PM<sub>10</sub> concentrations on the day of the test.

<sup>d</sup> N=1,676 participants, n = 4,005 observations for NO<sub>2</sub> and NO<sub>x</sub> and N=1,674 participants, n = 3,974 observations for all other associations due to some missings for air pollution concentrations on the test day.



**Supplemental material, Table S6** Adjusted <sup>a</sup> associations <sup>b</sup> between physical performance (performance-based and self-reported) and residential air pollution exposure from linear mixed model analyses, restricted to participants who completed all three cycles of data collection.

| Pollutant            | Increment                             | Performance-based <sup>c</sup> |                |         | Self-reported <sup>d</sup> |               |         |
|----------------------|---------------------------------------|--------------------------------|----------------|---------|----------------------------|---------------|---------|
|                      |                                       | Mean difference                | (95% CI)       | p-value | Mean difference            | (95% CI)      | p-value |
| NO <sub>2</sub>      | 8.9 µg/m <sup>3</sup>                 | -0.26                          | (-0.49; -0.04) | 0.022   | 0.12                       | (-0.18; 0.42) | 0.441   |
| NO <sub>x</sub>      | 13.5 µg/m <sup>3</sup>                | -0.21                          | (-0.40; -0.03) | 0.027   | 0.15                       | (-0.10; 0.40) | 0.242   |
| PM <sub>2.5abs</sub> | 0.31 10 <sup>-5</sup> m <sup>-1</sup> | -0.17                          | (-0.37; 0.03)  | 0.092   | 0.07                       | (-0.20; 0.33) | 0.610   |
| PM <sub>2.5</sub>    | 1.4 µg/m <sup>3</sup>                 | 0.16                           | (-0.11; 0.43)  | 0.251   | -0.09                      | (-0.44; 0.27) | 0.627   |
| PM <sub>10</sub>     | 1.5 µg/m <sup>3</sup>                 | -0.24                          | (-0.41; -0.07) | 0.005   | 0.11                       | (-0.11; 0.34) | 0.319   |
| PM <sub>coarse</sub> | 0.8 µg/m <sup>3</sup>                 | -0.21                          | (-0.36; -0.05) | 0.008   | 0.12                       | (-0.08; 0.33) | 0.236   |

<sup>a</sup> Adjusted for age, sex, education level, smoking, alcohol consumption, depression physical activity, area-level socio economic status defined as the status score of the four-position postcode, and cross-products of time since baseline with education, alcohol consumption and depression.

<sup>b</sup> Associations are presented as mean difference in physical performance score with 95% confidence intervals (CI) for an interquartile range increase in air pollution exposure and were derived from models with exposure and exposure-time since baseline interaction.

<sup>c</sup> N=1,022 participants, n = 3,066 observations

<sup>d</sup> N=1,165 participants, n = 3,495 observations

**Supplemental material, Table S7.** Adjusted <sup>a</sup> associations <sup>b</sup> between physical performance (performance-based and self-reported) and residential air pollution exposure from linear mixed model analyses, restricted to participants who did not change address between three years prior to the 2005/2006 cycle and the last completed cycle.

| Pollutant             | Increment                             | Performance-based <sup>c</sup> |                |         | Self-reported <sup>d</sup> |               |         |
|-----------------------|---------------------------------------|--------------------------------|----------------|---------|----------------------------|---------------|---------|
|                       |                                       | Mean difference                | (95% CI)       | p-value | Mean difference            | (95% CI)      | p-value |
| NO <sub>2</sub>       | 8.9 µg/m <sup>3</sup>                 | -0.38                          | (-0.60; -0.15) | 0.001   | 0.17                       | (-0.12; 0.46) | 0.252   |
| NO <sub>x</sub>       | 13.5 µg/m <sup>3</sup>                | -0.27                          | (-0.46; -0.09) | 0.004   | 0.28                       | (0.03; 0.52)  | 0.026   |
| PM <sub>2.5</sub> abs | 0.31 10 <sup>-5</sup> m <sup>-1</sup> | -0.25                          | (-0.44; -0.05) | 0.014   | 0.06                       | (-0.20; 0.31) | 0.662   |
| PM <sub>2.5</sub>     | 1.4 µg/m <sup>3</sup>                 | 0.03                           | (-0.23; 0.29)  | 0.823   | -0.19                      | (-0.52; 0.15) | 0.276   |
| PM <sub>10</sub>      | 1.5 µg/m <sup>3</sup>                 | -0.29                          | (-0.46; -0.13) | 0.001   | 0.14                       | (-0.07; 0.36) | 0.188   |
| PM <sub>coarse</sub>  | 0.8 µg/m <sup>3</sup>                 | -0.24                          | (-0.39; -0.09) | 0.001   | 0.18                       | (-0.01; 0.38) | 0.069   |

<sup>a</sup> Adjusted for age, sex, education level, smoking, alcohol consumption, depression, physical activity, area-level socio economic status defined as the status score of the four-position postcode, and cross-products of time since baseline with education, alcohol consumption and depression.

<sup>b</sup> Associations are presented as mean difference in physical performance score with 95% confidence intervals (CI) for an interquartile range increase in air pollution exposure and were derived from models with exposure and exposure-time since baseline interaction.

<sup>c</sup> N=1,247 participants, n = 3,042 observations

<sup>d</sup> N=1,287 participants, n = 3,218 observations

**Supplemental material, Table 8.** Post hoc sensitivity analyses of residual confounding of the association between air pollution and performance-based physical functioning due to an unmeasured binary confounder (U).

|                                                                                             |                                                 |             |
|---------------------------------------------------------------------------------------------|-------------------------------------------------|-------------|
| Outcome                                                                                     | Performance-based physical functioning          |             |
| Exposure contrast                                                                           | 4th vs 1st quartile of NO <sub>2</sub> exposure |             |
| Effect estimate (exposure – outcome)                                                        | -0.46 points                                    |             |
| Difference in outcome per year                                                              | -0.30 points                                    |             |
| <b>Sensitivity analysis specifications and results</b>                                      |                                                 |             |
| <i>Hypothetical relation of U to cognitive outcome (U - outcome)</i>                        |                                                 |             |
| Difference in cognitive outcome, U = 1 vs U = 0                                             | -0.6 points                                     | -1.5 points |
| Years apart in age associated with the same difference in outcome                           | 2 years                                         | 5 years     |
| <i>Resulting relation of U to exposure required to produce the reported effect estimate</i> |                                                 |             |
| Difference in the prevalence of U, high vs low exposure <sup>a</sup>                        | 77%                                             | 31%         |
| Equivalent minimum relative odds (OR) of high exposure, U = 1 vs U = 0 <sup>b</sup>         | 59.2                                            | 3.6         |

<sup>a</sup> For details on the method used please see Vanderweele TJ and Arah OA. 2011. Unmeasured confounding for general outcomes, treatments, and confounders: Bias formulas for sensitivity analyses. *Epidemiology* 22(1):42-52.

<sup>b</sup> Prevalence differences are absolute not relative differences. Given the difference in U prevalence shown, the minimum OR of high exposure is the smallest OR across all possible pairs of U prevalence.

**Supplemental material, Table S9.** Adjusted<sup>a</sup> associations<sup>b</sup> between physical performance (performance-based and self-reported) and residential air pollution exposure from linear mixed model analyses without exposure-time since baseline interaction terms.

| Pollutant             | Increment                             | Performance-based <sup>c</sup> |                 |         | Self-reported <sup>d</sup> |                |         |
|-----------------------|---------------------------------------|--------------------------------|-----------------|---------|----------------------------|----------------|---------|
|                       |                                       | Mean difference                | (95% CI)        | p-value | Mean difference            | (95% CI)       | p-value |
| NO <sub>2</sub>       | 8.9 µg/m <sup>3</sup>                 | -0.22                          | (-0.40; -0.04 ) | 0.014   | 0.21                       | (-0.06; 0.47 ) | 0.121   |
| NO <sub>x</sub>       | 13.5 µg/m <sup>3</sup>                | -0.17                          | (-0.32; -0.02 ) | 0.022   | 0.23                       | (0.01; 0.46 )  | 0.037   |
| PM <sub>2.5</sub> abs | 0.31 10 <sup>-5</sup> m <sup>-1</sup> | -0.12                          | (-0.27; 0.04 )  | 0.142   | 0.10                       | (-0.14; 0.33 ) | 0.413   |
| PM <sub>2.5</sub>     | 1.4 µg/m <sup>3</sup>                 | 0.08                           | (-0.13; 0.28 )  | 0.456   | -0.16                      | (-0.46; 0.15 ) | 0.311   |
| PM <sub>10</sub>      | 1.5 µg/m <sup>3</sup>                 | -0.19                          | (-0.32; -0.06 ) | 0.005   | 0.17                       | (-0.03; 0.36 ) | 0.096   |
| PM <sub>coarse</sub>  | 0.8 µg/m <sup>3</sup>                 | -0.16                          | (-0.29; -0.04 ) | 0.008   | 0.20                       | (0.02; 0.38 )  | 0.031   |

<sup>a</sup> Adjusted for age, sex, education level, smoking, alcohol consumption, depression, physical activity, area-level socio economic status defined as the status score of the four-position postcode, and cross-products of time since baseline with education, alcohol consumption and depression.

<sup>b</sup> Associations are presented as mean difference in physical performance score with 95% confidence intervals (CI) for an interquartile range increase in air pollution exposure.

<sup>c</sup> N=1,695 participants, n = 4,105 observations

<sup>d</sup> N=1,758 participants, n = 4,405 observations

Supplemental material, Figure S1. Flow-chart of the study sample.

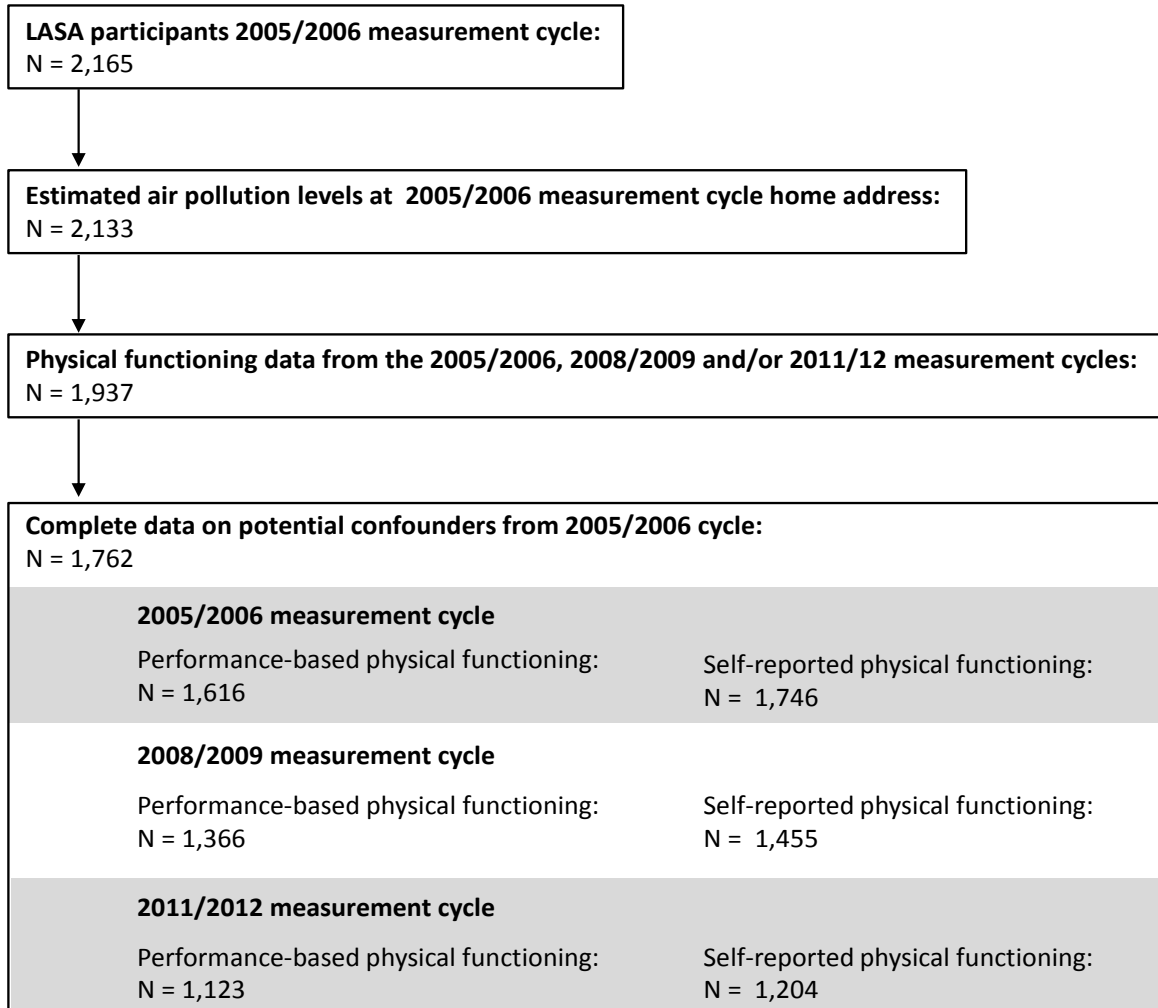

**Supplemental material, Figure S2.** Adjusted<sup>a</sup> associations<sup>b</sup> between self-reported physical functioning and quartiles of residential air pollution exposure from linear mixed model analyses with p-values of F-tests for equality of means and trend tests using quartile midpoints (N=1,758 participants, n=4,405 observations).

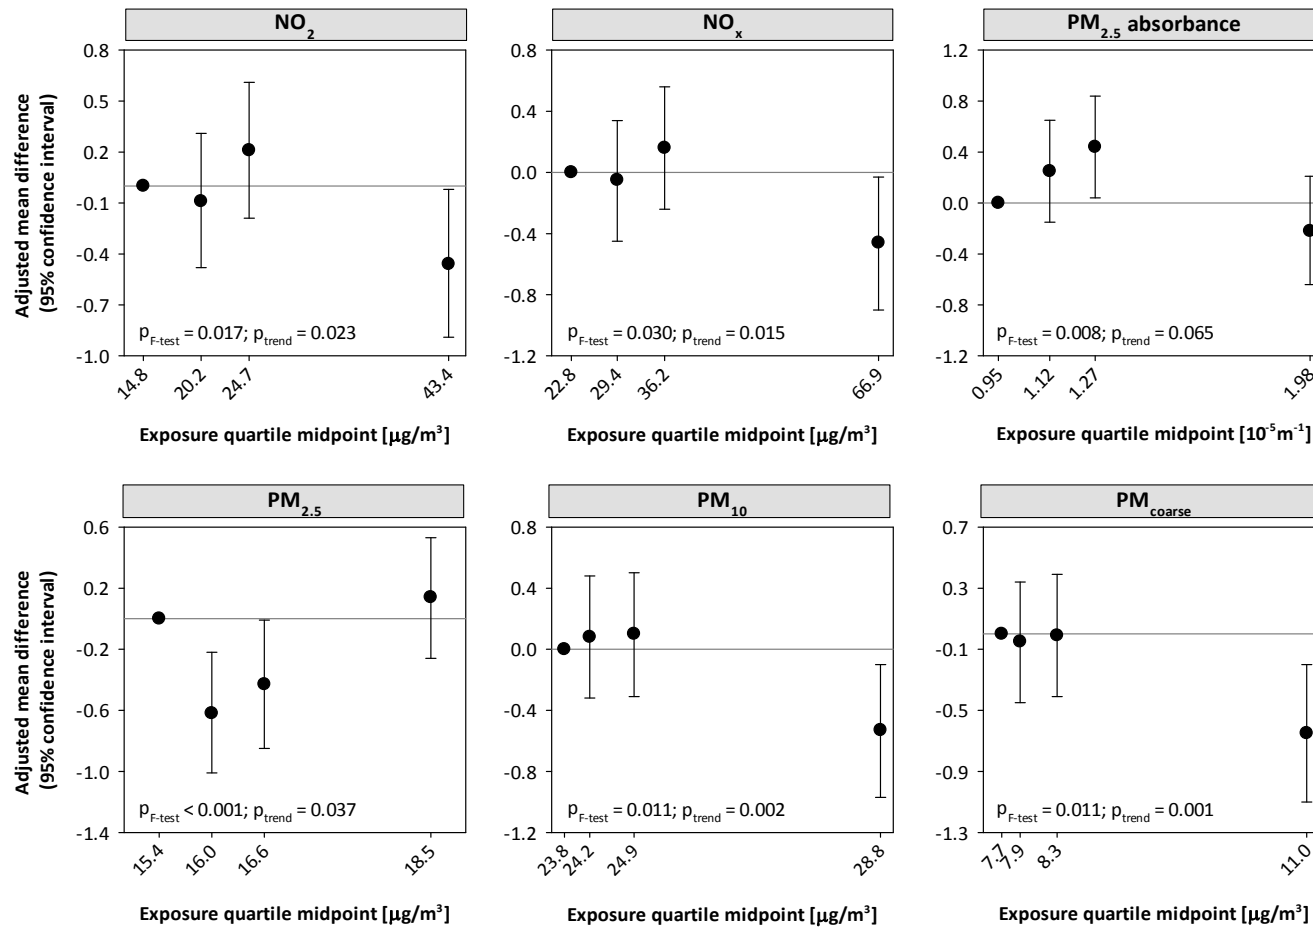

- <sup>a</sup> Adjusted for age, sex, education level, smoking, alcohol consumption, depression, physical activity, area-level socio economic status defined as the status score of the four-position postcode, and cross-products of time since baseline with education, alcohol consumption and depression..
- <sup>b</sup> Associations are presented as mean difference in physical performance score in the different quartiles as compared to the 1<sup>st</sup> quartile with 95% confidence intervals and were derived from models with exposure and exposure-time since baseline interaction.

**Supplemental material, Figure S3.** Adjusted <sup>a</sup> sex-specific associations <sup>b</sup> between performance-based physical functioning and residential air pollution exposure from linear mixed model analyses with exposure-sex interaction terms (N=1,735 participants, n=4,039 observations). Grey dots represent females, white dots represent males.

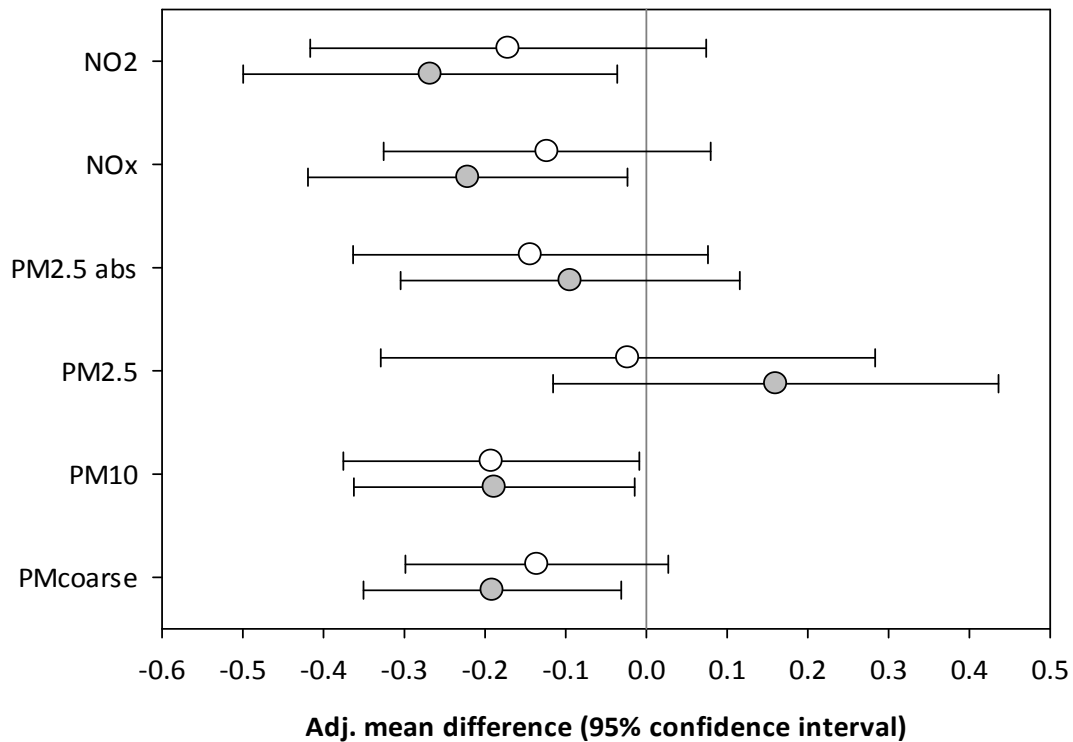

<sup>a</sup> Adjusted for age, education level, smoking, alcohol consumption, depression, physical activity, area-level socio economic status defined as the status score of the four-position postcode, and cross-products of time since baseline with education, alcohol consumption and depression..

<sup>b</sup> Associations are presented as mean difference in physical performance score with 95% confidence intervals (CI) for an interquartile range increase in air pollution exposure and were derived from models with exposure and exposure-time since baseline interaction.
